# Supplementary material
Source: publisher site journal article supplement (http://www.kjim.org/upload/media/kjim-2021-409-suppl2.pdf)
Supplement: Supplementary file 1 [file kjim-2021-409-suppl2.pdf]

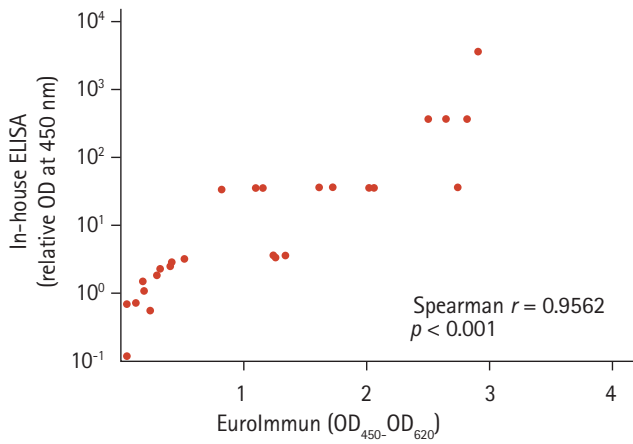

**Supplementary Figure 1.** Correlation between in-house enzyme-linked immunosorbent assay (ELISA) and commercial anti-severe acute respiratory syndrome coronavirus-2 (SARS-CoV-2) immunoglobulin G ELISA (EUROIMMUN anti-SARS-CoV-2 ELISA). OD, optical density.
